# Supplementary material for: Automatic design of stigmergy-based behaviours for robot swarms
Source: Springer Nature journal article supplement (doi:10.1038/s44172-024-00175-7), 2024-02-14
Supplement: 44172_2024_175_MOESM3_ESM.pdf [file 44172_2024_175_MOESM3_ESM.pdf]

## Description of Additional Supplementary Files

**File name:** Supplementary Video 1

**Description:** v1-aggregation: This video presents details of the Aggregation mission and demonstrates collective behaviors with physical robots and in simulation for all methods under analysis.

**File name:** Supplementary Video 2

**Description:** v2-decision-making: This video presents details of the Decision-Making mission and demonstrates collective behaviors with physical robots and in simulation for all methods under analysis.

**File name:** Supplementary Video 3

**Description:** v3-rendezvous-point: This video presents details of the Rendezvous-Point mission and demonstrates collective behaviors with physical robots and in simulation for all methods under analysis.

**File name:** Supplementary Video 4

**Description:** v4-stop: This video presents details of the Stop mission and demonstrates collective behaviors with physical robots and in simulation for all methods under analysis.

**File name:** Supplementary Video 5

**Description:** v5-robot-view: The video presents an e-puck robot's view of laying and sensing the artificial pheromone.

**File name:** Supplementary Video 6

**Description:** v6-experiments: The video presents all real-robots experiment runs performed during this study.
